# Supplementary material for: Amorphous NiFe layered double hydroxide nanosheets decorated on 3D nickel phosphide nanoarrays: a hierarchical core–shell electrocatalyst for efficient oxygen evolution
Source: Royal Society of Chemistry journal article supplement (doi:10.1039/c8ta02967a), 2018-01-01
Supplement: c8ta02967a1.pdf [file c8ta02967a1.pdf]

## Supplementary Information for

### **Amorphous NiFe layered double hydroxide nanosheets decorated on 3D nickel phosphide nanoarrays: a hierarchical core-shell electrocatalyst for efficient oxygen evolution**

Luo Yu,<sup>ab</sup> Haiqing Zhou,<sup>b</sup> Jingying Sun,<sup>b</sup> Ishwar Kumar Mishra,<sup>b</sup> Dan Luo,<sup>b</sup> Fang Yu,<sup>b</sup> Ying Yu,<sup>\*a</sup>  
Shuo Chen<sup>\*b</sup> and Zhifeng Ren<sup>\*b</sup>

<sup>a</sup> College of Physical Science and Technology, Central China Normal University, Wuhan 430079, China

<sup>b</sup> Department of Physics and TcSUH, University of Houston, Houston, TX 77204, USA

\* Corresponding author. Email: [yuying01@mail.ccnu.edu.cn](mailto:yuying01@mail.ccnu.edu.cn) (Y.Y); [schen34@uh.edu](mailto:schen34@uh.edu) (S. C.);  
and [zren@uh.edu](mailto:zren@uh.edu) (Z. F. R.).

## Experimental Section

**Chemicals.** Nickel(II) nitrate hexahydrate ( $\text{Ni}(\text{NO}_3)_2 \cdot 6\text{H}_2\text{O}$ , 98%, Sigma-Aldrich), iron(II) sulfate heptahydrate ( $\text{FeSO}_4 \cdot 7\text{H}_2\text{O}$ ,  $\geq 99.95\%$ , Sigma-Aldrich), nafion 117 solution (5%, Sigma-Aldrich), iridium oxide powder ( $\text{IrO}_2$ , 99%, Alfa Aesar), potassium hydroxide (KOH, 50% w/v, Alfa Aesar), red phosphorous powder ( $\text{P}$ ,  $\geq 97\%$ , Sigma-Aldrich), potassium hydroxide (KOH, 50% w/v, Alfa Aesar), and Ni foam (thickness: 1.6 mm) were used as received. Deionized water (resistivity: 18.3  $\text{M}\Omega \cdot \text{cm}$ ) was used for the preparation of all aqueous solutions.

**Synthesis of  $\text{Ni}_5\text{P}_4/\text{NiP}_2$  foam.** The  $\text{Ni}_5\text{P}_4/\text{NiP}_2$  microsheet arrays catalyst was synthesized by direct phosphorization of the commercial Ni foam in a tube furnace according to previous reports.<sup>1, 2</sup> The precursor phosphorus powder (100 mg) was placed at the upstream during the phosphorization, and a small piece of Ni foam ( $\sim 1 \text{ cm}^2$ ) was placed at the middle ( $\sim 14 \text{ cm}$  apart from the P source) of tube furnace in a direction perpendicular to the argon (Ar) gas flow. The temperature was raised at a constant rate of  $15 \text{ }^\circ\text{C min}^{-1}$  to  $500 \text{ }^\circ\text{C}$  and kept at  $500 \text{ }^\circ\text{C}$  for 1 hour for the growth. Then the sample was taken out after the furnace was automatically turned off and naturally cooled down to room temperature under Ar atmosphere.

**Fabrication of  $\text{Ni}_5\text{P}_4/\text{NiP}_2/\text{NiFe}$  LDH electrode.** The 3D core-shell  $\text{Ni}_5\text{P}_4/\text{NiP}_2/\text{NiFe}$  LDH electrode was synthesized by growing NiFe LDH nanosheets on the as-prepared  $\text{Ni}_5\text{P}_4/\text{NiP}_2$  foam via our previous electrodeposition method,<sup>3</sup> which was carried out in a three-electrode configuration by using as-prepared  $\text{Ni}_5\text{P}_4/\text{NiP}_2$  foam, Pt net and saturated calomel electrode (SCE) as the working, counter and reference electrode, respectively. The electrolyte was prepared by dissolving  $\text{Ni}(\text{NO}_3)_2 \cdot 6\text{H}_2\text{O}$  (0.15 M) and  $\text{FeSO}_4 \cdot 7\text{H}_2\text{O}$  (0.15 M) in 100 mL water with a continuous Ar flow. The applied potential was -1.0 V vs. SCE, and different electrodeposition time with 30, 60, 75, and 90 s were used to control the amount of the NiFe LDH, which were labeled with

Ni<sub>5</sub>P<sub>4</sub>/NiP<sub>2</sub>/NiFe LDH-30, Ni<sub>5</sub>P<sub>4</sub>/NiP<sub>2</sub>/NiFe LDH-60, Ni<sub>5</sub>P<sub>4</sub>/NiP<sub>2</sub>/NiFe LDH-75, and Ni<sub>5</sub>P<sub>4</sub>/NiP<sub>2</sub>/NiFe LDH-90, respectively. The loading mass of NiFe LDH for the four samples are 1.1, 1.9, 2.4, and 3.0 mg cm<sup>-2</sup>, respectively. The samples were then washed with deionized water and dried in air. For comparison, pure NiFe LDH was prepared on Ni foam by the same method for 75 s.

**Preparation of IrO<sub>2</sub> electrode on Ni foam.** To prepare the IrO<sub>2</sub> electrode, 40 mg IrO<sub>2</sub> and 60  $\mu$ L Nafion, 540  $\mu$ L ethanol and 400  $\mu$ L deionized water were ultrasonicated for 30 min to obtain a homogeneous dispersion. Then, the dispersion was coated onto a Ni foam, which was then dried in air overnight at room temperature. The loading of IrO<sub>2</sub> catalyst on Ni foam is  $\sim$  2 mg cm<sup>-2</sup>, just the same with that of NiFe LDH on Ni<sub>5</sub>P<sub>4</sub>/NiP<sub>2</sub> foam.

**Materials characterization.** The morphology and crystal structure of the samples were investigated with scanning electron microscopy (SEM, LEO 1525) and transmission electron microscope (TEM, JEOL 2010F) coupled with energy dispersive X-ray (EDX) spectroscopy. The phase composition of the samples was characterized by X-ray diffraction (PANalytical X'pert PRO diffractometer with a Cu Ka radiation source). X-ray photoelectron spectroscopy (XPS) (PHI Quantera XPS) was conducted using a PHI Quantera SXM Scanning X-ray Microprobe.

**Electrochemical Tests.** All electrochemical tests were carried out at room temperature on an electrochemical station (Bio-logic SP 150) in a typical three-electrode system with the prepared samples as the working electrode, a Pt net (graphite foil for HER) as the counter electrode, and a standard Hg/HgO electrode as the reference. The OER activity was assessed using linear sweep voltammetry (LSV) with a sweep rate of 2 mV s<sup>-1</sup> and chronopotentiometry at constant current densities of 10, 100, and 200 mA cm<sup>-2</sup> in O<sub>2</sub>-saturated 1 M KOH solution. The HER tests were conducted in Ar-saturated 1 M KOH solution with a sweep rate of 2 mV s<sup>-1</sup>. Cyclic voltammetry

(CV) curves were collected at different scan rates in the potentials from 1.025 V to 1.125 V vs RHE to estimate the double-layer capacitance. Electrochemical impedance spectroscopy (EIS) was measured at an overpotential of 250 mV from 0.1 Hz to 100 KHz with an amplitude of 10 mV. The overall water splitting performance was evaluated in 1 M KOH using a two-electrode configuration, and the polarization curve was recorded at a scan rate of 2 mV s<sup>-1</sup>. All the measured potentials vs. Hg/HgO were converted to RHE by the Nernst equation ( $E_{\text{RHE}} = E_{\text{Hg/HgO}} + 0.0591 \text{ pH} + 0.098$ ). All the curves were reported with iR compensation.

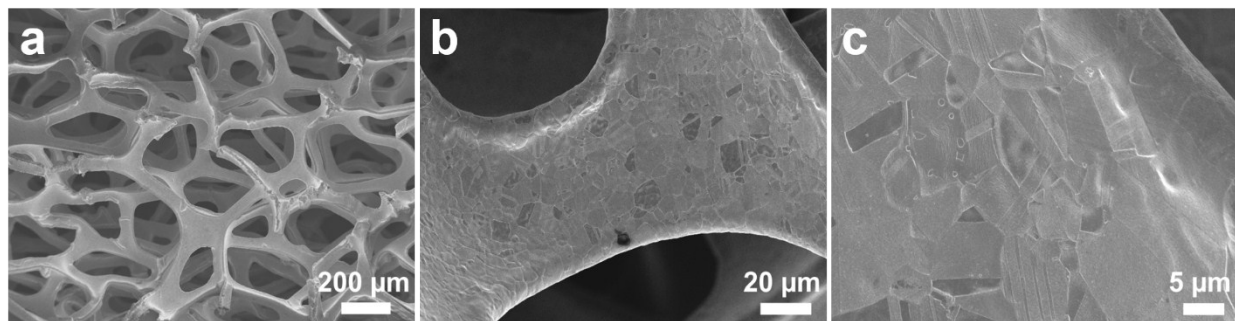

**Fig. S1** SEM images of the commercial Ni foam.

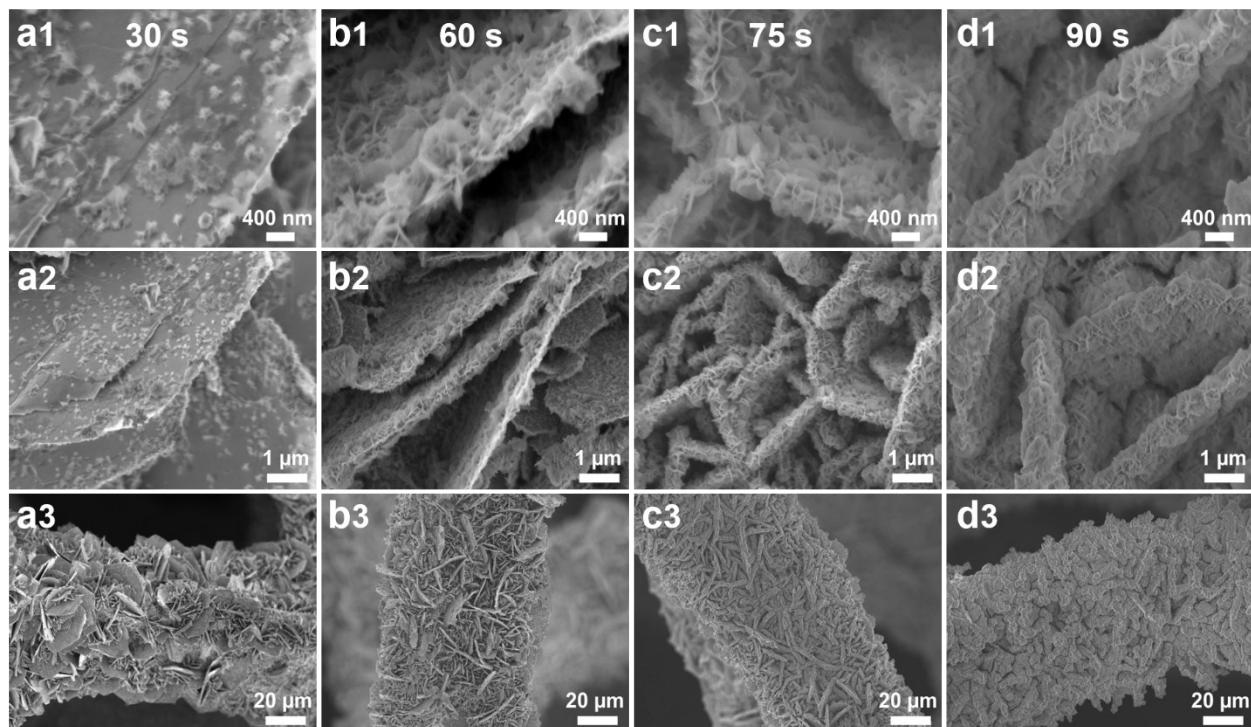

**Fig. S2** SEM images of  $\text{Ni}_5\text{P}_4/\text{NiP}_2/\text{NiFe}$  LDH samples prepared under different electrodeposition time of NiFe LDH. (a1-a3) 30 s; (b1-b3) 60 s; (c1-c3) 75 s; (d1-d3) 90 s.

The NiFe LDH nanosheets grew very fast on the  $\text{Ni}_5\text{P}_4/\text{NiP}_2$  foam via electrodeposition method. For 30 s sample, we can observe that there were scattered NiFe LDH nanosheets attached on the  $\text{Ni}_5\text{P}_4/\text{NiP}_2$  microsheets. After another 30 s, the nanosheets were fully decorated with the edges of microsheets exposing outside. For the 75 s sample, all the  $\text{Ni}_5\text{P}_4/\text{NiP}_2$  microsheets were uniformly decorated NiFe LDH nanosheets, and the large interspace between the neighboring arrays was totally preserved. For the 90 s sample, the thickness of the hybrid microsheets was much improved, and some NiFe LDH nanosheets even blocked the interspace.

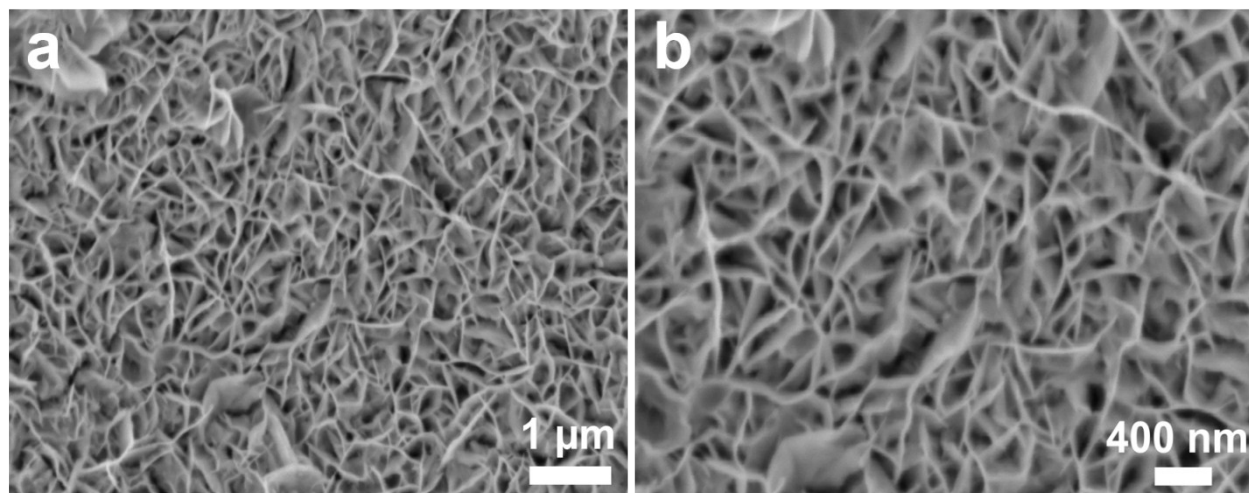

**Fig. S3** SEM images of pure NiFe LDH on Ni foam.

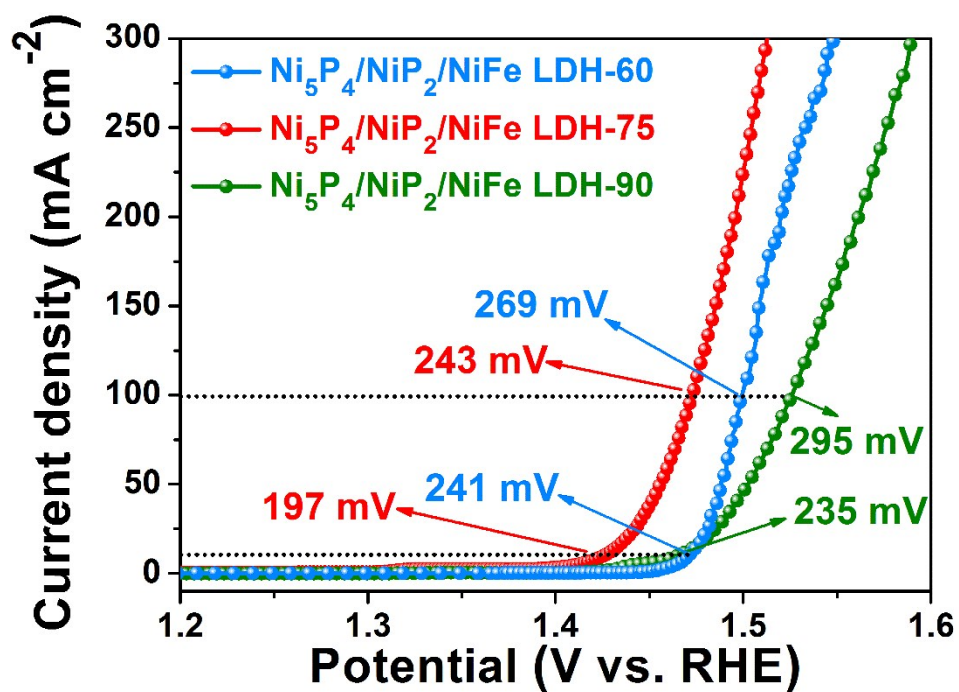

**Fig. S4** OER polarization curves of  $\text{Ni}_5\text{P}_4/\text{NiP}_2/\text{NiFe}$  LDH electrodes with different electrodeposition time of NiFe LDH.



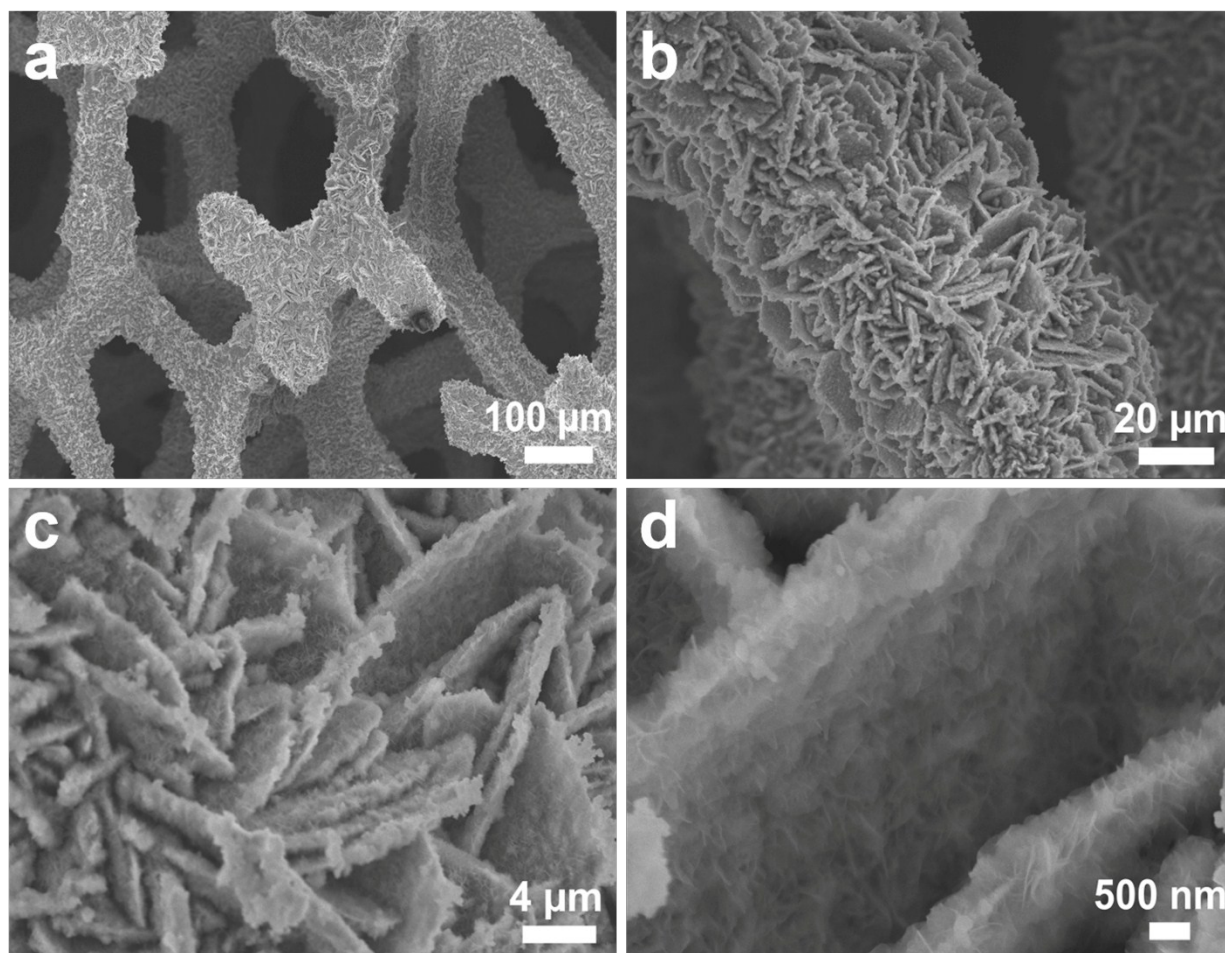

**Fig. S5** SEM images of  $\text{Ni}_5\text{P}_4/\text{NiP}_2/\text{NiFe}$  LDH after long-term stability tests.

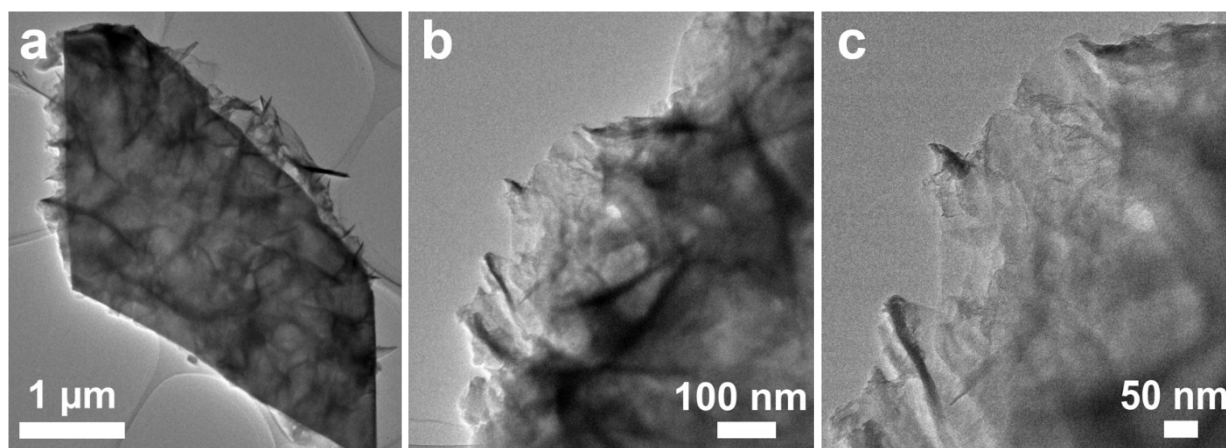

**Fig. S6** TEM images of  $\text{Ni}_5\text{P}_4/\text{NiP}_2/\text{NiFe}$  LDH after long-term stability tests.

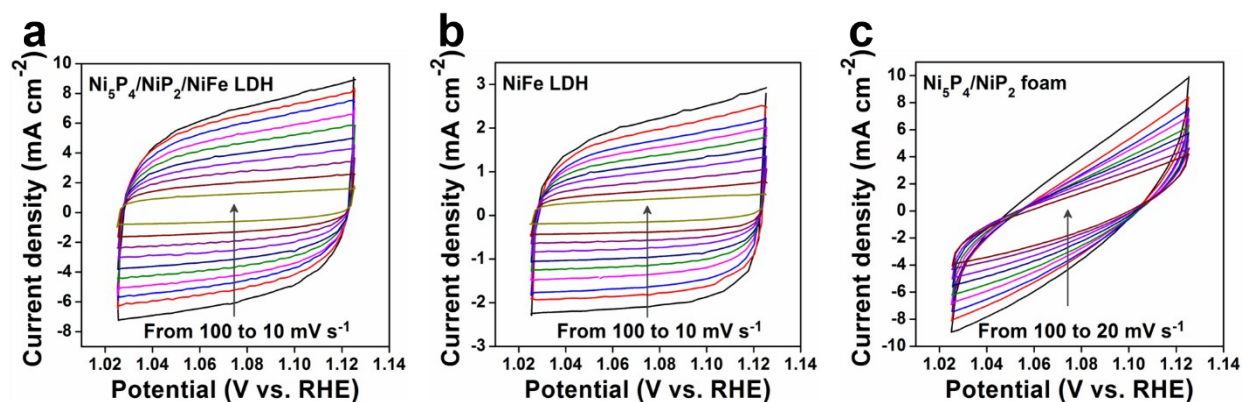

**Fig. S7** Cyclic voltammograms of (a)  $\text{Ni}_5\text{P}_4/\text{NiP}_2/\text{NiFe}$  LDH, and (b) pure  $\text{NiFe}$  LDH at scan rates ranging from  $10 \text{ mV s}^{-1}$  to  $100 \text{ mV s}^{-1}$ , (c)  $\text{Ni}_{2(1-x)}\text{Mo}_{2x}\text{P}$  at scan rates ranging from  $20 \text{ mV s}^{-1}$  to  $100 \text{ mV s}^{-1}$  with an interval point of  $10 \text{ mV s}^{-1}$ . The scanning potential range is from  $1.025 \text{ V}$  to  $1.125 \text{ V}$  vs RHE.

**Table S1.** Comparison of the OER performance for the Ni<sub>5</sub>P<sub>4</sub>/NiP<sub>2</sub>/NiFe LDH catalyst with other reported OER electrocatalysts in 1 M alkaline media (KOH or NaOH). Here  $\eta_{10}$ ,  $\eta_{100}$ , and  $\eta_{300}$  correspond to the overpotentials at current densities of 10, 100, and 300 mA cm<sup>-2</sup>, respectively.

| Catalyst                                                   | $\eta_{10}$<br>(mV) | $\eta_{100}$<br>(mV) | $\eta_{300}$<br>(mV) | Tafel slope<br>(mV dec <sup>-1</sup> ) | Stability test                                    | Reference                                                            |
|------------------------------------------------------------|---------------------|----------------------|----------------------|----------------------------------------|---------------------------------------------------|----------------------------------------------------------------------|
| Ni <sub>5</sub> P <sub>4</sub> /NiP <sub>2</sub> /NiFe LDH | 197                 | 243                  | 283                  | 46.6                                   | 72 h at 10, 100 and 200 mA cm <sup>-2</sup>       | This work                                                            |
| Cu@NiFe LDH                                                | 199                 | 281                  | 305*                 | 27.8                                   | 48 h at 10 and 100 mA cm <sup>-2</sup>            | <i>Energy Environ. Sci.</i> <b>2017</b> , 10, 1820-1827.             |
| NiFe LDH/graphene                                          | 210                 | 325*                 | NA                   | 52                                     | 10 h at 5 and 10 mA cm <sup>-2</sup>              | <i>Adv. Mater.</i> <b>2017</b> , 29, 1700017.                        |
| Co <sub>0.85</sub> Se/NiFe LDH                             | 203                 | 294*                 | NA                   | 57                                     | 10 h at 200 mA cm <sup>-2</sup>                   | <i>Energy Environ. Sci.</i> <b>2016</b> , 9, 478-483.                |
| FeOOH/NiFe LDH                                             | 208                 | 247                  | 263*                 | 42.5                                   | 20 h at 10, 100, 300, and 500 mA cm <sup>-2</sup> | <i>ACS Appl. Mater. Interfaces</i> <b>2016</b> , 9, 464-471.         |
| NiFe LDH/CNT                                               | 247                 | NA                   | NA                   | 31                                     | 1 h at 10 and 20 mA cm <sup>-2</sup>              | <i>J. Am. Chem. Soc.</i> <b>2013</b> , 135, 8452-8455.               |
| Exfoliated NiFe LDH                                        | 302                 | NA                   | NA                   | 40                                     | 13 h at 5 and 10 mA cm <sup>-2</sup>              | <i>Nat. Commun.</i> <b>2014</b> , 5, 4477.                           |
| NiFe LDH                                                   | 240                 | 450*                 | NA                   | NA                                     | 3 h at 6 mA cm <sup>-2</sup>                      | <i>Science</i> <b>2014</b> , 345, 1593-1596.                         |
| (Ni,Co) <sub>0.85</sub> Se/<br>NiCo LDH                    | 216                 | 285*                 | NA                   | 85                                     | 24 h at 10 mA cm <sup>-2</sup>                    | <i>Adv. Mater.</i> <b>2016</b> , 28, 77-85.                          |
| Exfoliated NiCo LDH                                        | 367                 | NA                   | NA                   | 40                                     | 6 h at 10 and 20 mA cm <sup>-2</sup>              | <i>Nano Lett.</i> <b>2015</b> , 15, 1421-1427.                       |
| Cu@CoFe LDH                                                | 240                 | 300                  | NA                   | 44.4                                   | 24 h at 10 mA cm <sup>-2</sup>                    | <i>Nano Energy</i> <b>2017</b> , 41, 327-336.                        |
| Ni <sub>0.75</sub> V <sub>0.25</sub> LDH                   | 305                 | NA                   | NA                   | 50                                     | 24 h at 10 mA cm <sup>-2</sup>                    | <i>Nat. Commun.</i> <b>2016</b> , 7, 11981.                          |
| CoMn LDH                                                   | 324                 | NA                   | NA                   | 43                                     | 14 h at 10 mA cm <sup>-2</sup>                    | <i>J. Am. Chem. Soc.</i> <b>2014</b> , 136, 16481-16484.             |
| NiFeCr LDH                                                 | 280                 | NA                   | NA                   | 129                                    | 6 h at 10 mA cm <sup>-2</sup>                     | <i>Adv. Energy Mater.</i> <b>2018</b> , DOI: 10.1002/aenm.201703189. |
| N doped CoFe LDH                                           | 233                 | NA                   | NA                   | 40.03                                  | NA                                                | <i>Adv. Funct. Mater.</i> <b>2018</b> , 28, 1703363.                 |
| NiFe-OH/NiFeP                                              | 199                 | 245                  | NA                   | 39                                     | 24 h at 10 mA cm <sup>-2</sup>                    | <i>ACS Energy Lett.</i> <b>2017</b> , 2, 1035-1042.                  |
| Fe <sub>x</sub> Co <sub>1-x</sub> OOH                      | 266                 | 300*                 | NA                   | 30                                     | 24 h at 10 mA cm <sup>-2</sup>                    | <i>Angew. Chem. Int. Ed.</i> <b>2018</b> , 57, 1-6.                  |
| NiPS <sub>3</sub> /NiOOH                                   | NA                  | 225*                 | 320*                 | NA                                     | 160 h at 10 mA cm <sup>-2</sup>                   | <i>ACS Catal.</i> <b>2017</b> , 7, 229-237.                          |
| FeOOH/Co/FeOOH                                             | NA                  | 308*                 | NA                   | 32                                     | 60 h at 20, 50, 100, and 200 mA cm <sup>-2</sup>  | <i>Angew. Chem., Int. Ed.</i> <b>2016</b> , 55, 3694-3698.           |
| Gelled FeCoW/Au                                            | 191                 | 253*                 | NA                   | 37                                     | 550 h at 30 mA cm <sup>-2</sup>                   | <i>Science</i> <b>2016</b> , 352, 333-337.                           |
| Ni <sub>x</sub> Fe <sub>1-x</sub> Se <sub>2</sub>          | 195                 | 225*                 | NA                   | 28                                     | 24 h at 10 mA cm <sup>-2</sup>                    | <i>Nat. Commun.</i> <b>2016</b> , 7, 12324.                          |
| NiCoP/C                                                    | 330                 | 430*                 | NA                   | 96                                     | 10 h at 10 mA cm <sup>-2</sup>                    | <i>Angew. Chem.</i> <b>2017</b> , 129, 3955-3958.                    |
| Ultrathin Co <sub>3</sub> O <sub>4</sub> nanosheets        | 265*                | 535*                 | NA                   | 49.1                                   | 15 h at 10 mA cm <sup>-2</sup>                    | <i>Adv. Energy Mater.</i> <b>2018</b> , 8, 1701694.                  |

\* The value is calculated from the curves shown in the literatures.

## References

- (1) I. K. Mishra, H. Zhou, J. Sun, K. Dahal, Z. Ren, R. He, S. Chen and Z. Ren, *Mater. Today Phys.*, 2018, **4**, 1-6.
- (2). X. Wang, Y. V. Kolen'ko, X. Q. Bao, K. Kovnir and L. Liu, *Angew. Chem. Int. Ed.*, 2015, **54**, 8188-8192.
- (3) L. Yu, H. Zhou, J. Sun, F. Qin, F. Yu, J. Bao, Y. Yu, S. Chen and Z. Ren, *Energy Environ. Sci.*, 2017, **10**, 1820-1827.
